# Supplementary material for: Dementia and Related Comorbidities in the Population Aged 90 and Over in the Vitality 90+ Study, Finland: Patterns and Trends From 2001 to 2018
Source: PubMed Central journal article supplement (PMC10150268; doi:10.1177/08982643221123451), 2022-10-18
Supplement: sj-pdf-1-jah-10.1177_08982643221123451.pdf [file sj-pdf-1-jah-10.1177_08982643221123451.pdf]

**Supplement Table 1. Prevalence of disease combinations among participants with dementia in each study year**

|                                              | <b>2001</b> | <b>2003</b> | <b>2007</b> | <b>2010</b> | <b>2014</b> | <b>2018</b> |
|----------------------------------------------|-------------|-------------|-------------|-------------|-------------|-------------|
|                                              | % (n)       | % (n)       | % (n)       | % (n)       | % (n)       | % (n)       |
| Hypertension & heart disease                 | 21.6 (81)   | 26.3 (115)  | 22.1 (97)   | 25.0 (135)  | 32 (223)    | 37.6 (289)  |
| Hypertension & diabetes                      | 5.6 (21)    | 5.5 (24)    | 5.7 (25)    | 6.3 (34)    | 10.5 (73)   | 15.1 (116)  |
| Hypertension & osteoarthritis                | 10.4 (39)   | 11.2 (49)   | 14.6 (64)   | 18.3 (99)   | 24.2 (169)  | 27.2 (209)  |
| Hypertension & hip fracture                  | 4.8 (18)    | 7.1 (31)    | 5.5 (24)    | 8.0 (43)    | 10.3 (72)   | 10.3 (79)   |
| Hypertension & depression                    | 11.2 (42)   | 12.8 (56)   | 10.5 (46)   | 13.9 (75)   | 13.8 (96)   | 17.8 (137)  |
| Heart disease & cancer                       | 7.7 (29)    | 7.3 (32)    | 6.4 (28)    | -           | 9.3 (65)    | 8.3 (64)    |
| Heart disease & diabetes                     | 9.6 (36)    | 14.4 (32)   | 6.4 (28)    | 7.6 (41)    | 8.7 (61)    | 11.7 (90)   |
| Heart disease & osteoarthritis               | 20.8 (78)   | 21.5 (94)   | 16.4 (72)   | 22.9 (124)  | 24.2 (169)  | 25.4 (195)  |
| Heart disease & hip fracture                 | 9.1 (34)    | 11.2 (49)   | 7.1 (31)    | 11.3 (61)   | 10.7 (75)   | 9.6 (74)    |
| Heart disease & depression                   | 18.9 (71)   | 19.9 (87)   | 14.1 (62)   | 16.5 (89)   | 14.3 (100)  | 14.8 (114)  |
| Cancer & osteoarthritis                      | 4.5 (17)    | 4.1 (18)    | 3.9 (17)    | -           | 6.9 (48)    | 6.5 (50)    |
| Osteoarthritis & hip fracture                | 5.9 (22)    | 8.7 (38)    | 4.3 (19)    | 8.7 (47)    | 10.0 (70)   | 8.2 (63)    |
| Osteoarthritis & depression                  | 11.5 (43)   | 13.5 (59)   | 10.5 (46)   | 13.7 (74)   | 13.6 (95)   | 13.3 (102)  |
| Hypertension, heart disease & osteoarthritis | 7.2 (27)    | 9.6 (42)    | 8.2 (36)    | 11.8 (64)   | 15.9 (111)  | 18.8 (144)  |
| Hypertension, heart disease & depression     | 7.7 (29)    | 9.6 (42)    | 6.4 (28)    | 8.7 (47)    | 8.3 (58)    | 11.7 (90)   |
| Hypertension, osteoarthritis & depression    | 4.5 (17)    | 5.7 (25)    | 5.2 (23)    | 7.0 (38)    | 8.3 (58)    | 9.4 (72)    |
| Heart disease, osteoarthritis & depression   | 6.7 (25)    | 9.1 (40)    | 5.7 (25)    | 9.6 (52)    | 8.2 (57)    | 8.1 (62)    |

**Supplement Table 2. Association of combinations of chronic conditions with dementia in the six study waves. Logistic regression analysis with odds ratios (OR) and 95% Confidence Intervals (CI) adjusted for age and gender. Odds >1.00 indicate higher prevalence among people with dementia**

|                                              | 2001        |                  | 2003        |                  | 2007        |                  | 2010        |                  | 2014        |                  | 2018        |                  |
|----------------------------------------------|-------------|------------------|-------------|------------------|-------------|------------------|-------------|------------------|-------------|------------------|-------------|------------------|
|                                              | OR          | 95% CI           | OR          | 95% CI           | OR          | 95% CI           | OR          | 95% CI           | OR          | 95% CI           | OR          | 95% CI           |
| Hypertension & heart disease                 | 1.18        | 0.85-1.65        | 1.17        | 0.86-1.59        | <b>0.62</b> | <b>0.46-0.83</b> | <b>0.60</b> | <b>0.47-0.77</b> | <b>0.78</b> | <b>0.63-0.96</b> | 1.00        | 0.83-1.21        |
| Hypertension & diabetes                      | <b>2.25</b> | <b>1.11-4.55</b> | 1.48        | 0.80-2.73        | 0.72        | 0.43-1.22        | <b>0.67</b> | <b>0.44-1.03</b> | 1.05        | 0.76-1.45        | 1.11        | 0.86-1.45        |
| Hypertension & osteoarthritis                | 0.78        | 0.51-1.19        | <b>0.64</b> | <b>0.44-0.94</b> | <b>0.44</b> | <b>0.32-0.62</b> | <b>0.54</b> | <b>0.41-0.71</b> | <b>0.67</b> | <b>0.53-0.84</b> | <b>0.74</b> | <b>0.60-0.91</b> |
| Hypertension & hip fracture                  | 0.98        | 0.52-1.84        | 1.00        | 0.60-1.66        | <b>0.45</b> | <b>0.27-0.74</b> | 0.80        | 0.54-1.20        | 1.05        | 0.75-1.46        | 1.33        | 0.96-1.84        |
| Hypertension & depression                    | <b>2.49</b> | <b>1.48-4.20</b> | <b>2.10</b> | <b>1.32-3.32</b> | 1.30        | 0.84-2.03        | <b>2.04</b> | <b>1.40-2.97</b> | <b>1.99</b> | <b>1.43-2.76</b> | <b>3.26</b> | <b>2.39-4.44</b> |
| Heart disease & cancer                       | 1.65        | 0.94-2.90        | 1.20        | 0.71-2.02        | 0.90        | 0.54-1.52        | -           | -                | 0.96        | 0.68-1.35        | 0.78        | 0.56-1.08        |
| Heart disease & diabetes                     | <b>1.79</b> | <b>1.07-3.00</b> | 1.17        | 0.69-1.99        | 0.96        | 0.57-1.63        | 1.00        | 0.65-1.52        | 1.05        | 0.74-1.49        | 1.26        | 0.93-1.69        |
| Heart disease & osteoarthritis               | 0.91        | 0.65-1.26        | 1.01        | 0.73-1.38        | <b>0.49</b> | <b>0.36-0.68</b> | <b>0.76</b> | <b>0.58-0.98</b> | 0.84        | 0.67-1.06        | 0.94        | 0.76-1.17        |
| Heart disease & hip fracture                 | 1.02        | 0.63-1.64        | 1.25        | 0.81-1.92        | <b>0.54</b> | <b>0.34-0.85</b> | 1.17        | 0.81-1.70        | 1.18        | 0.85-1.65        | 1.34        | 0.96-1.88        |
| Heart disease & depression                   | <b>2.3</b>  | <b>1.55-3.43</b> | <b>2.39</b> | <b>1.63-3.52</b> | 1.31        | 0.89-1.94        | <b>2.76</b> | <b>1.89-4.02</b> | <b>2.32</b> | <b>1.67-3.24</b> | <b>2.94</b> | <b>2.12-4.08</b> |
| Cancer & osteoarthritis                      | 1.09        | 0.57-2.11        | 0.80        | 0.43-1.49        | 0.79        | 0.42-1.48        | -           | -                | 1.01        | 0.68-1.49        | <b>0.59</b> | <b>0.41-0.83</b> |
| Osteoarthritis & hip fracture                | 0.84        | 0.48-1.47        | 1.36        | 0.83-2.23        | <b>0.32</b> | <b>0.19-0.54</b> | 0.82        | 0.55-1.22        | 1.30        | 0.92-1.85        | 1.03        | 0.73-1.45        |
| Osteoarthritis & depression                  | 1.24        | 0.80-1.92        | <b>2.02</b> | <b>1.30-3.15</b> | 1.10        | 0.72-1.69        | <b>2.11</b> | <b>1.44-3.09</b> | <b>1.94</b> | <b>1.40-2.69</b> | <b>2.7</b>  | <b>1.92-3.79</b> |
| Hypertension, heart disease & osteoarthritis | 0.91        | 0.54-1.51        | 0.92        | 0.60-1.42        | <b>0.41</b> | <b>0.27-0.62</b> | <b>0.57</b> | <b>0.41-0.79</b> | 0.77        | 0.59-1.00        | 0.95        | 0.75-1.20        |
| Hypertension, heart disease & depression     | <b>2.41</b> | <b>1.30-4.46</b> | <b>2.59</b> | <b>1.48-4.55</b> | 0.98        | 0.58-1.66        | <b>2.16</b> | <b>1.34-3.48</b> | <b>2.06</b> | <b>1.36-3.12</b> | <b>3.21</b> | <b>2.20-4.68</b> |
| Hypertension, osteoarthritis & depression    | 1.51        | 0.74-3.08        | 1.77        | 0.92-3.38        | 0.88        | 0.50-1.53        | <b>1.73</b> | <b>1.05-2.84</b> | <b>1.76</b> | <b>1.18-2.64</b> | <b>2.82</b> | <b>1.88-4.25</b> |
| Heart disease, osteoarthritis & depression   | 1.15        | 0.66-2.01        | <b>2.15</b> | <b>1.25-3.70</b> | 0.83        | 0.49-1.42        | <b>2.82</b> | <b>1.72-4.60</b> | <b>1.66</b> | <b>1.12-2.48</b> | <b>2.53</b> | <b>1.66-3.87</b> |

Notes: Analyses were conducted for each combination separately.  
 Bolding indicates statistically significant association.

**Supplement Table 3. Prevalence of disease combinations among participants without dementia in each study year**

|                                              | <b>2001</b> | <b>2003</b> | <b>2007</b> | <b>2010</b> | <b>2014</b> | <b>2018</b> |
|----------------------------------------------|-------------|-------------|-------------|-------------|-------------|-------------|
|                                              | % (n)       | % (n)       | % (n)       | % (n)       | % (n)       | % (n)       |
| Hypertension & heart disease                 | 18.8 (94)   | 23.3 (116)  | 31.4 (155)  | 36.3 (262)  | 37.6 (347)  | 37.4 (407)  |
| Hypertension & diabetes                      | 2.6 (13)    | 4.0 (20)    | 7.9 (39)    | 10 (72)     | 10.5 (97)   | 14.2 (154)  |
| Hypertension & osteoarthritis                | 12.8 (64)   | 16.6 (83)   | 28.2 (139)  | 29.2 (211)  | 32.3 (298)  | 32.8 (357)  |
| Hypertension & hip fracture                  | 4.8 (24)    | 6.8 (34)    | 10.8 (53)   | 9.4 (68)    | 9.6 (89)    | 7.8 (85)    |
| Hypertension & depression                    | 4.8 (24)    | 6.4 (32)    | 8.7 (43)    | 7.3 (53)    | 7.6 (70)    | 6.3 (68)    |
| Heart disease & cancer                       | 4.8 (24)    | 6.0 (30)    | 6.9 (34)    | -           | 9.8 (90)    | 10.3 (112)  |
| Heart disease & diabetes                     | 5.6 (28)    | 12.6 (33)   | 6.5 (32)    | 8.2 (59)    | 8.9 (82)    | 9.7 (106)   |
| Heart disease & osteoarthritis               | 22.2 (111)  | 21.6 (108)  | 28.4 (140)  | 28.1 (203)  | 27.5 (254)  | 25.7 (280)  |
| Heart disease & hip fracture                 | 8.6 (43)    | 9.0 (45)    | 11.8 (58)   | 9.3 (67)    | 9.1 (84)    | 7.1 (77)    |
| Heart disease & depression                   | 9.4 (47)    | 9.4 (47)    | 11.6 (57)   | 6.7 (48)    | 7.0 (65)    | 5.6 (61)    |
| Cancer & osteoarthritis                      | 4.2 (21)    | 5.2 (26)    | 5.1 (25)    | -           | 6.9 (64)    | 10.3 (112)  |
| Osteoarthritis & hip fracture                | 6.8 (34)    | 6.4 (32)    | 12.4 (61)   | 9.7 (70)    | 7.6 (70)    | 7.6 (83)    |
| Osteoarthritis & depression                  | 9.4 (47)    | 7 (35)      | 10.1 (50)   | 6.9 (50)    | 7.9 (73)    | 5.3 (58)    |
| Hypertension, heart disease & osteoarthritis | 7.8 (39)    | 10.4 (52)   | 18.1 (89)   | 18.8 (136)  | 19.6 (181)  | 19.0 (207)  |
| Hypertension, heart disease & depression     | 3.4 (17)    | 3.8 (19)    | 6.7 (33)    | 4.2 (30)    | 4.4 (41)    | 4.0 (43)    |
| Hypertension, osteoarthritis & depression    | 3 (15)      | 3.2 (16)    | 6.3 (31)    | 4.2 (30)    | 5.1 (47)    | 3.5 (38)    |
| Heart disease, osteoarthritis & depression   | 5.8 (29)    | 4.4 (22)    | 7.1 (35)    | 3.6 (26)    | 5.4 (50)    | 3.3 (36)    |
